# Supplementary material for: Single-component, metal-free, solvent-free HO-functionalized 1,2,3-triazole-based ionic liquid catalysts for efficient CO2 conversion
Source: Royal Society of Chemistry journal article supplement (doi:10.1039/d2nj02052a), 2022-01-01
Supplement: d2nj02052a1.pdf [file d2nj02052a1.pdf]

## Supplementary Information

### Single component, metal-free, solvent-free HO-functionalized 1,2,3-triazole-based ionic liquid catalysts for efficient CO<sub>2</sub> conversion

Álvaro Farias Arruda da Mata,<sup>[a]</sup> Nicolas Glanzmann,<sup>[b]</sup> Pedro Henrique Fazza Stroppa,<sup>[b]</sup> Felipe Terra Martins,<sup>[a]</sup> Rafael Pavão das Chagas,<sup>\*[a]</sup> Adilson David da Silva,<sup>\*[b]</sup> Jorge Luiz Sônego Milani<sup>\*[b]</sup>

[a] A. F. A. da Mata, F. T. Martins, R. P das Chagas\*  
Instituto de Química  
Universidade Federal de Goiás – UFG  
Goiânia – GO, Brazil

[b] J.L.S. Milani\*; A D da Silva\*, P. H. F. Stroppa, N. Glanzmann  
Departamento de Química  
Universidade Federal de Juiz de Fora – UFJF  
Juiz de Fora – MG, Brazil  
J. L. S. Milani – e-mail: jorge.milani@ufjf.edu.br  
A. D. da Silva – e-mail: david.silva@ufjf.edu.br  
R. P. das Chagas – e-mail: rpchagas@ufg.br

### Summary

|                                                   |    |
|---------------------------------------------------|----|
| 1. Experimental section.....                      | 2  |
| 1.1. Synthesis of triazole ionic liquids.....     | 2  |
| 1.2. Thermogravimetric analysis .....             | 9  |
| 1.3. Single crystal X-ray diffraction of 3b ..... | 14 |
| 1.4. Cycloaddition reactions .....                | 16 |
| 1.5. Reuse experiment.....                        | 25 |

# 1. Experimental section

## 1.1. Synthesis of triazole ionic liquids

**Synthesis of 4b.** To a round-bottom flask were added 1.3 mmol of **3a**, 52.4 mmol of NaBr, 2.5 mL of water and 7.5 mL of ethanol. The mixture was stirred at room temperature for 1 hour. Then, the ethanol was evaporated under reduced pressure and the residue was extracted with CH<sub>2</sub>Cl<sub>2</sub> and water. The organics were dried with anhydrous Na<sub>2</sub>SO<sub>4</sub>, filtered and the solvent was removed to yield the product as a brown gelatinous solid.

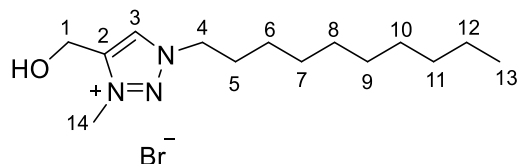

**Figure S1.** Compound **4b**.

Yield: 90%. <sup>1</sup>H NMR (500 MHz, CDCl<sub>3</sub>) δ (ppm), *J* (Hz): 0.88 (t, *J* = 6.9, 3H, H-13); 1.24 – 1.40 (m, 14H, H-6 a H-12); 2.03 (p, *J* = 7.5, 2H, H-5); 4.39 (s, 3H, H-14); 4.63 (t, *J* = 7.5, 2H, H-4); 5.04 (s, 2H, H-1); 8.97 (s, 1H, H-3). <sup>13</sup>C NMR (126 MHz, CDCl<sub>3</sub>) δ (ppm): 14.0 (C-13); 22.6 (C-12); 26.1 (C-11); 28.8; 29.1; 29.2; 29.3; 29.4 (C-6 a C-10); 31.7 (C-5); 39.4 (C-14); 52.7 (C-4); 54.3 (C-1); 129.8 (C-3); 143.7 (C-2). MALDI-TOF-MS: *m/z* calculated for C<sub>14</sub>H<sub>28</sub>N<sub>3</sub>O: [M]<sup>+</sup> = 254.2227, found 254.2230. MP (°C): 66-68.

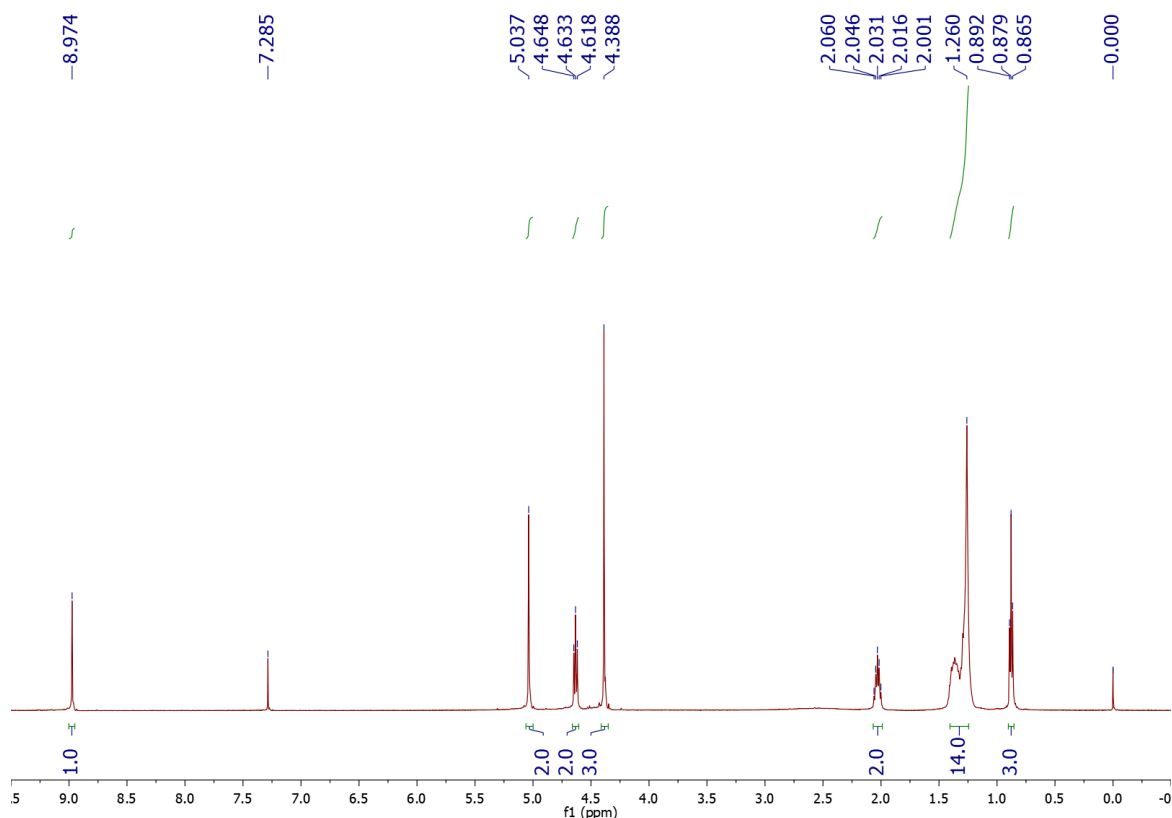

**Figure S2.** <sup>1</sup>H NMR spectra of **4b** (500 MHz, CDCl<sub>3</sub>).

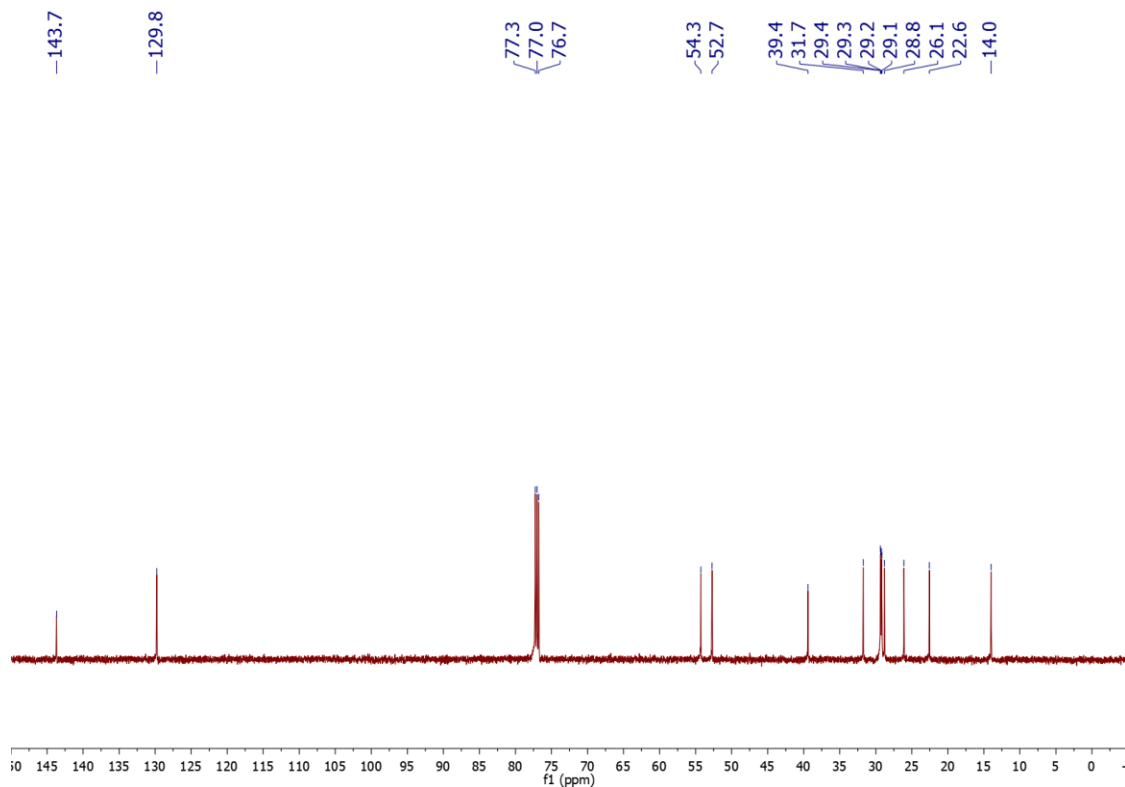

**Figure S3.**  $^{13}\text{C}$  NMR spectra of **4b** (126 MHz,  $\text{CDCl}_3$ ).

Data: PHF1010001.A13[c] 3 Oct 2016 10:15 Cal: 27 Jul 2021 10:46  
 Shimadzu Biotech Axima Performance 2.8.4.20081127: Mode Reflectron\_HiRes\_Fabio, Power: 60, P.Ext. @ 212 (bin 50)

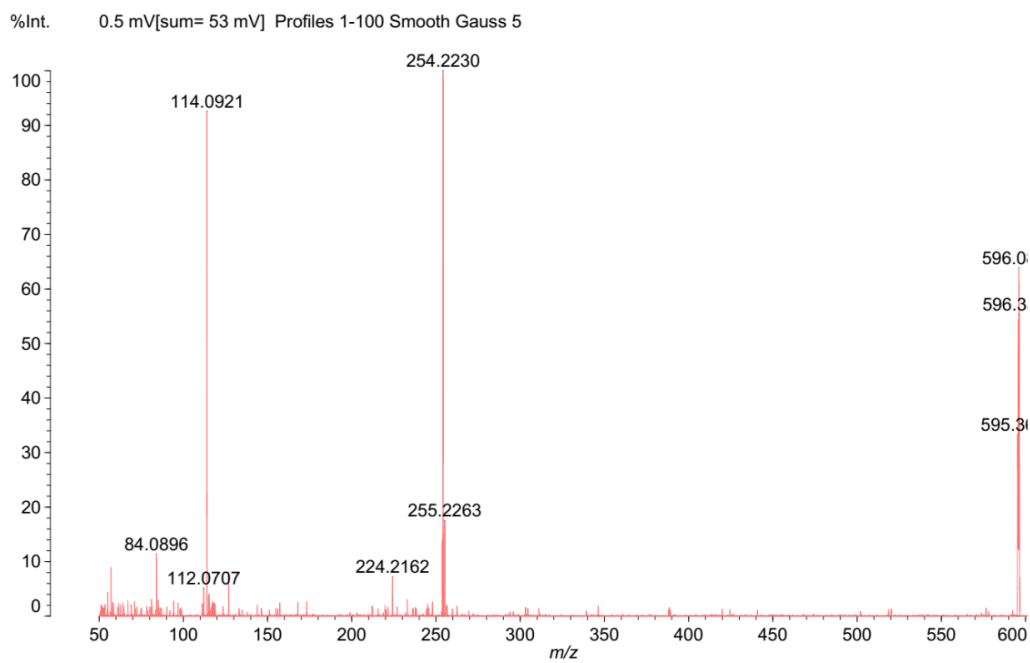

**Figure S4.** MALDI-TOF-MS spectra of **4b**.

**Synthesis of 8b and 9b.** An ion exchange column filled with Amberlite® IRA-400 resin was activated with a NaOH solution of 1M in deionized water. Then, 1.0 mmol of **3a** was slowly passed through the column using a mixture of ethanol and deionized water (7:3) as mobile phase. After the ion exchange, the mobile phase was added dropwise to 0.5 mmol of H<sub>2</sub>SO<sub>4</sub> (**8b**) or 1.0 mmol of TfOH (**9b**) in ethanol. Finally, the solvents were evaporated in reduced pressure and the products was obtained in the form of a brown gelatinous solid (**8b**) or a brown oil (**9b**).

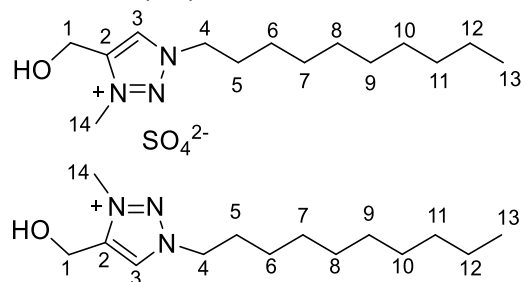

**Figure S5.** Compound **8b**.

Yield: 90%. <sup>1</sup>H NMR (500 MHz, CDCl<sub>3</sub>) δ (ppm), *J* (Hz): 0.87 (t, *J* = 6.9, 3H, H-13); 1.22 – 1.36 (m, 14H, H-6 a H-12); 1.96 (p, *J* = 6.9, 2H, H-5); 4.28 (s, 3H, H-14); 4.55 (t, *J* = 7.4, 2H, H-4); 4.91 (s, 2H, H-1); 8.62 (s, 1H, H-3). <sup>13</sup>C NMR (126 MHz, CDCl<sub>3</sub>) δ (ppm): 14.1 (C-13); 22.7 (C-12); 26.3 (C-11); 29.1; 29.2; 29.4; 29.5; 29.6 (C-6 a C-10); 31.9 (C-5); 38.3 (C-14); 52.5 (C-4); 53.8 (C-1); 129.3 (C-3); 143.6 (C-2). FT-ICR-MS: *m/z* calculated for C<sub>14</sub>H<sub>28</sub>N<sub>3</sub>O: [M]<sup>+</sup> = 254.22269, found 254.22469. MP (°C): 81-83.

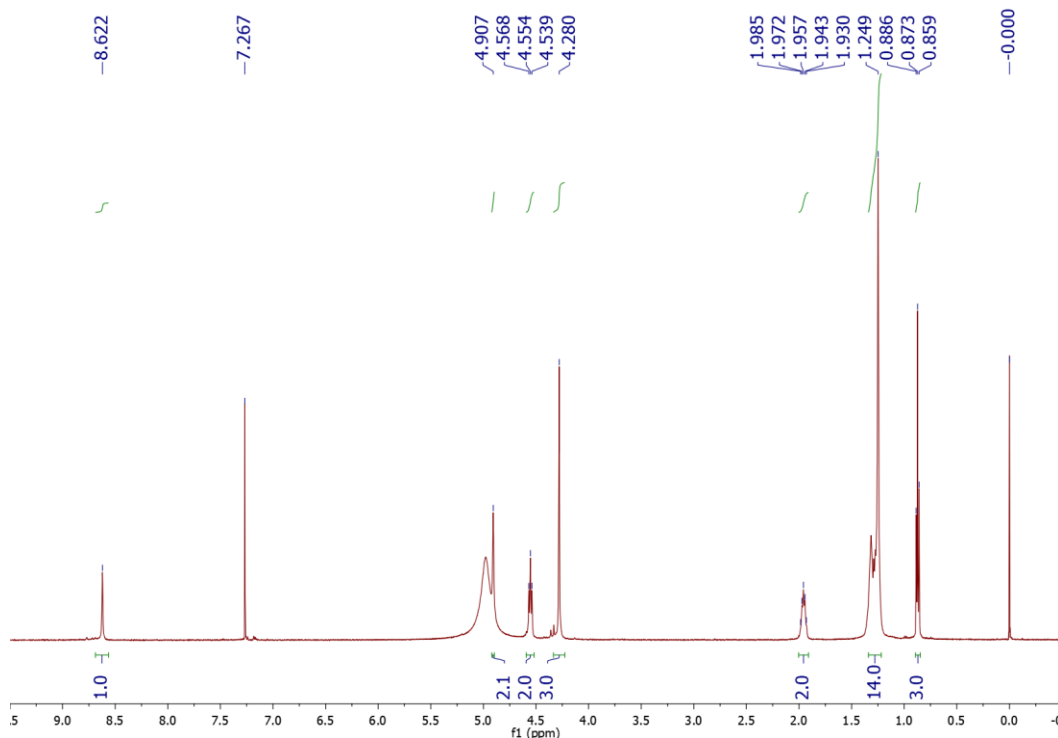

**Figure S6.** <sup>1</sup>H NMR spectra of **8b** (500 MHz, CDCl<sub>3</sub>).

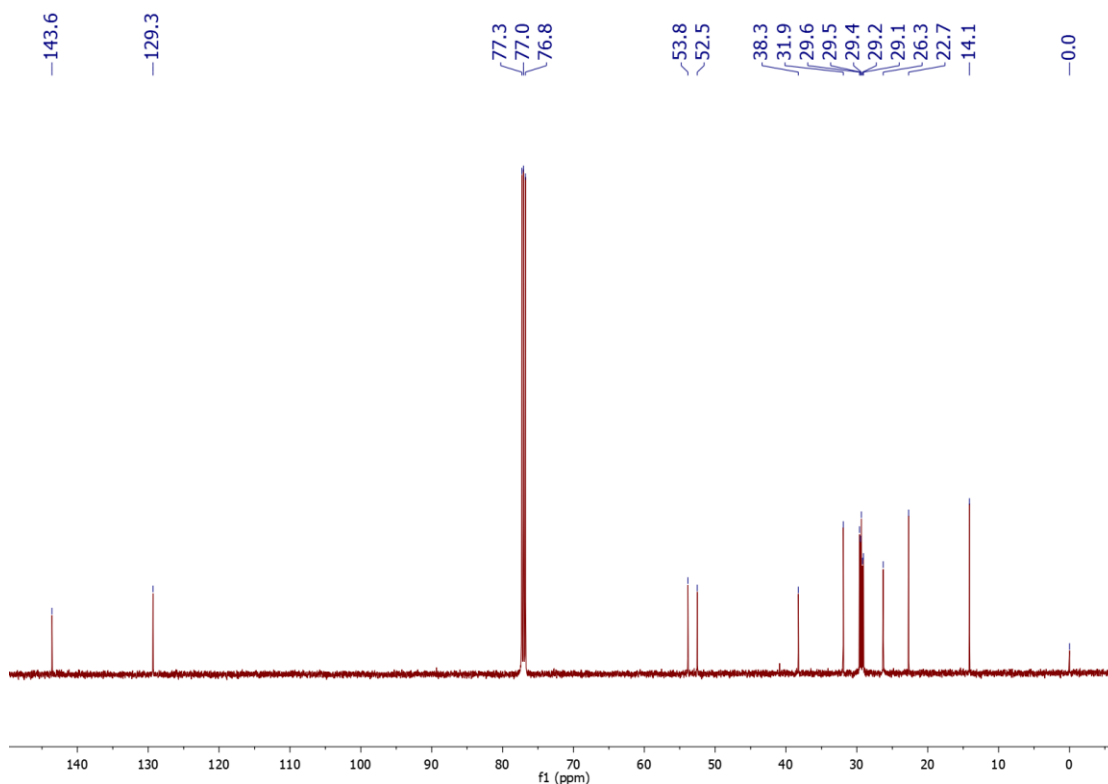

**Figure S7.**  $^{13}\text{C}$  NMR spectra of **8b** (126 MHz,  $\text{CDCl}_3$ ).

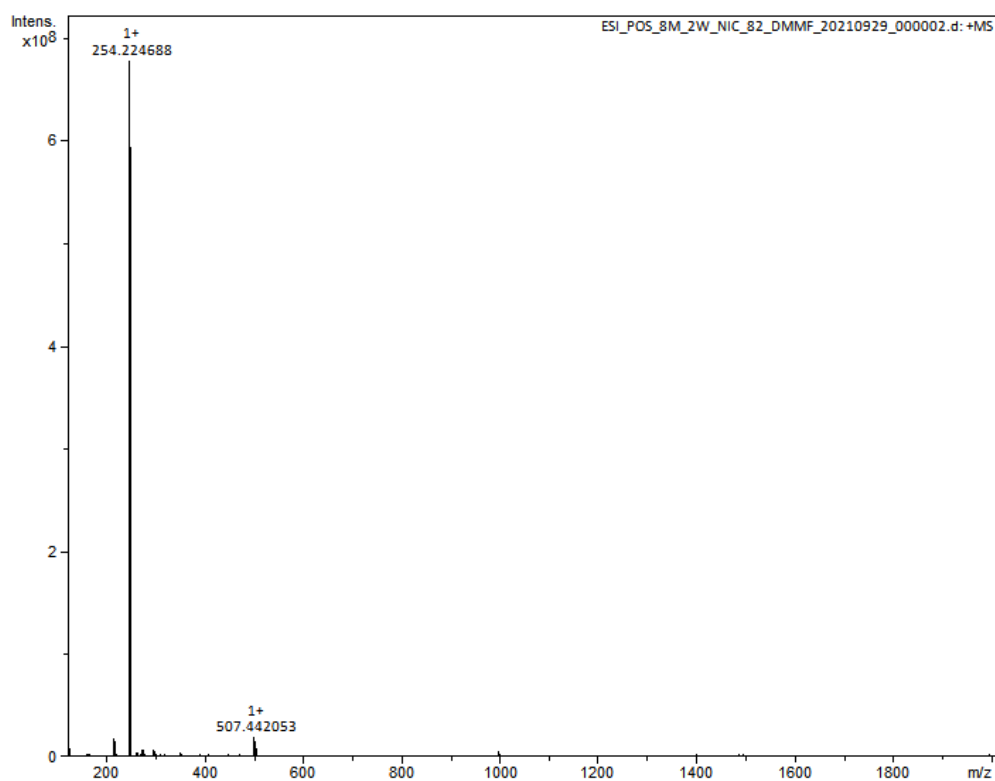

**Figure S8.** FT-ICR-MS spectra of **8b**.

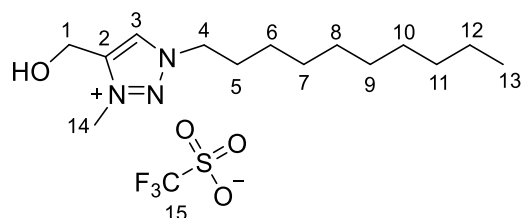

**Figure S9.** Compound **9b**.

Yield: 85%. <sup>1</sup>H NMR (500 MHz, CDCl<sub>3</sub>) δ (ppm), *J* (Hz): 0.88 (t, *J* = 6.9, 3H, H-13); 1.23 – 1.38 (m, 14H, H-6 a H-12); 1.98 (p, *J* = 7.6, 2H, H-5); 3.79 (s, 1H, OH); 4.28 (s, 3H, H-14); 4.50 (t, *J* = 7.5, 2H, H-4); 4.87 (s, 2H, H-1); 8.52 (s, 1H, H-3). <sup>13</sup>C NMR (126 MHz, CDCl<sub>3</sub>) δ (ppm), *J* (Hz): 14.1 (C-13); 22.7 (C-12); 26.1 (C-11); 28.8; 29.2; 29.2; 29.3; 29.5 (C-6 a C-10); 31.8 (C-5); 38.2 (C-14); 52.7 (C-4); 54.0 (C-1); 120.3 (q, *J* = 319.7, C-15); 129.0 (C-3); 143.9 (C-2). MALDI-TOF-MS: *m/z* calculated for C<sub>14</sub>H<sub>28</sub>N<sub>3</sub>O: [M]<sup>+</sup> = 254.2227, found 254.2224.

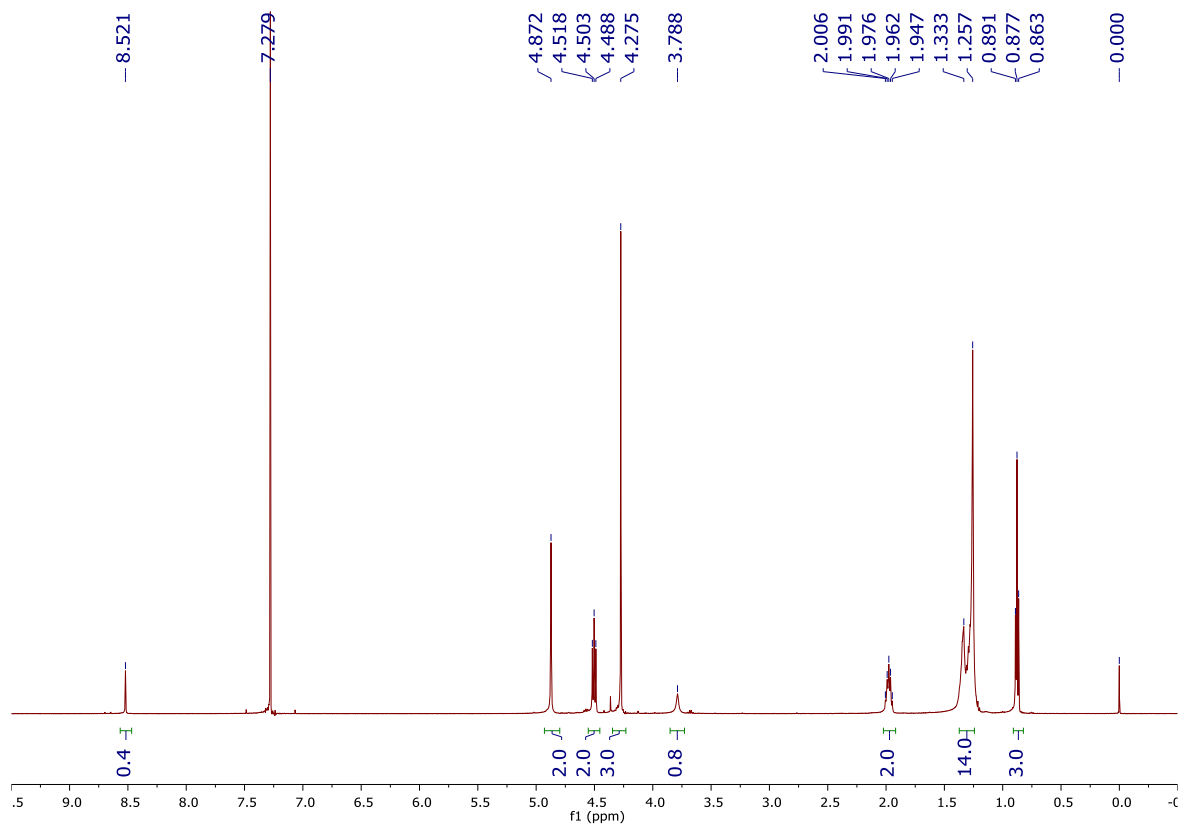

Figure S10.  $^1\text{H}$  NMR spectra of **9b** (500 MHz,  $\text{CDCl}_3$ ).

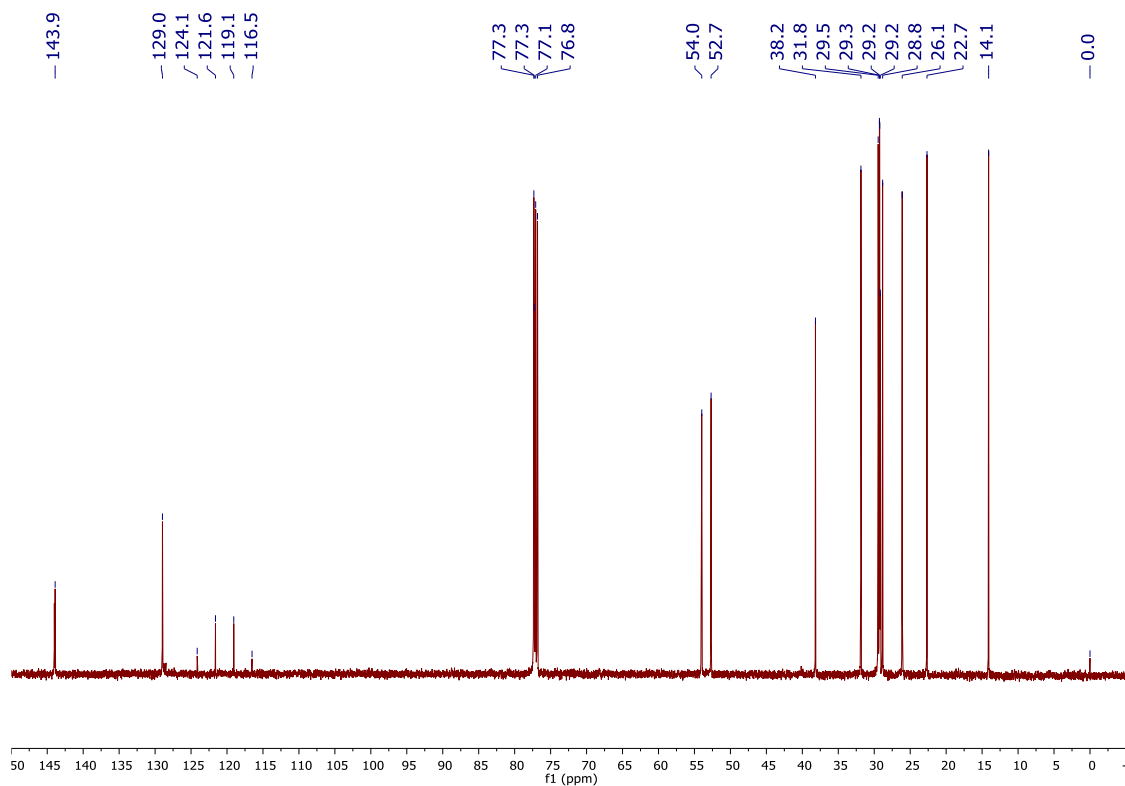

Figure S11.  $^{13}\text{C}$  NMR spectra of **9b** (126 MHz,  $\text{CDCl}_3$ ).

Data: PHD0100001(1).P11[c] 3 Oct 2016 10:49 Cal: 6 Dec 2021 19:04  
Shimadzu Biotech Axima Performance 2.8.4.20081127: Mode Reflectron\_HiRes\_Fabio, Power: 70, P.Ext. @ 212 (bin 50)

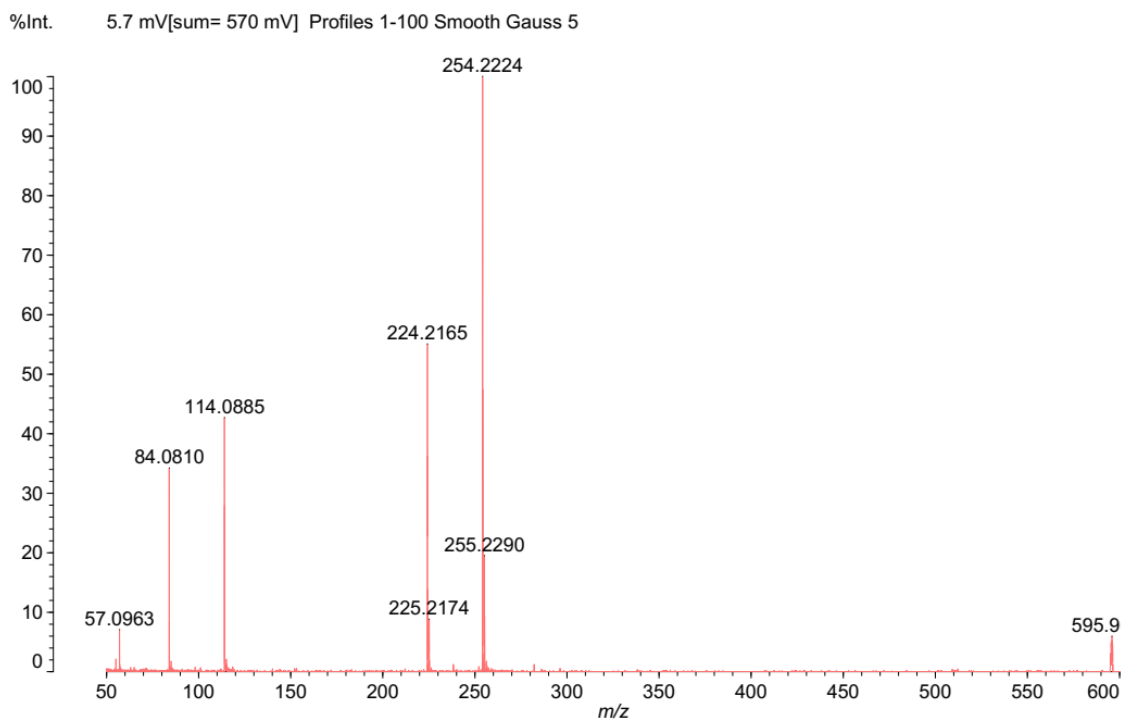

**Figure S12.** MALDI-TOF-MS spectra of **9b**.

Compound **3c** was synthesized according literature<sup>1</sup>

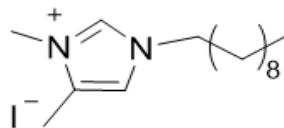

**Figure S13.** Compound **3c**, imidazole-IL derivative.



## 1.2. Thermogravimetric analysis

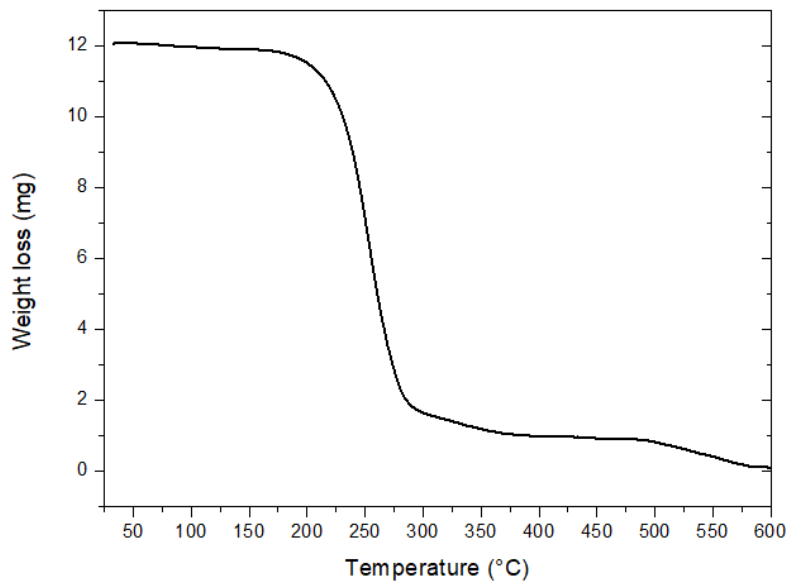

Figure S14. TG curves of **1b**.

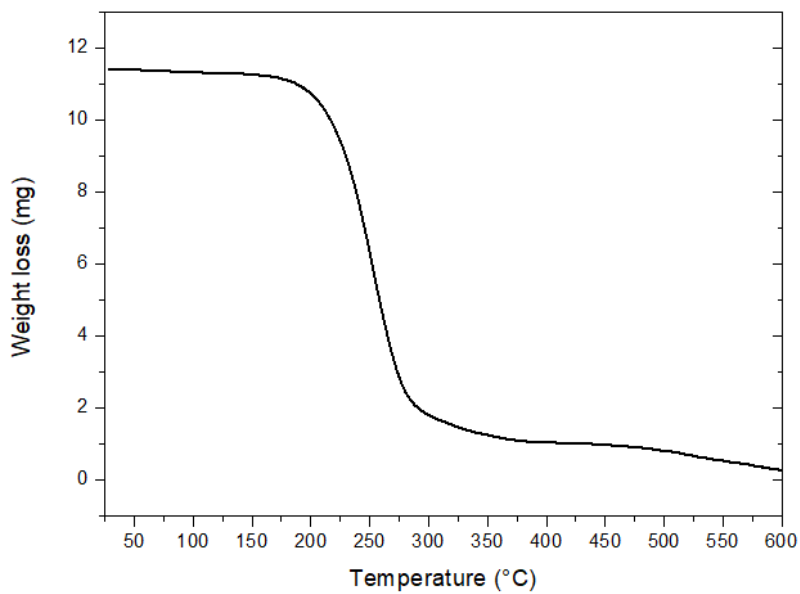

Figure S15. TG curves of **2b**.

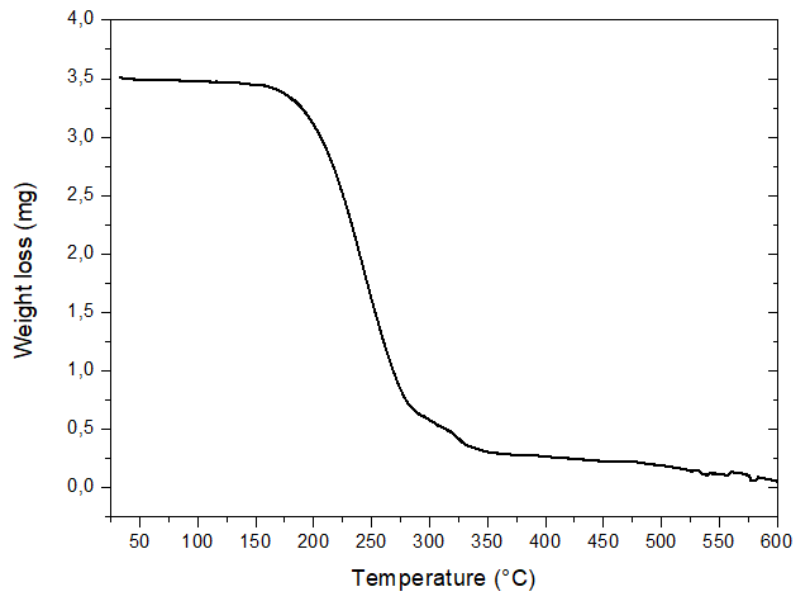

**Figure S16.** TG curves of **3b**.

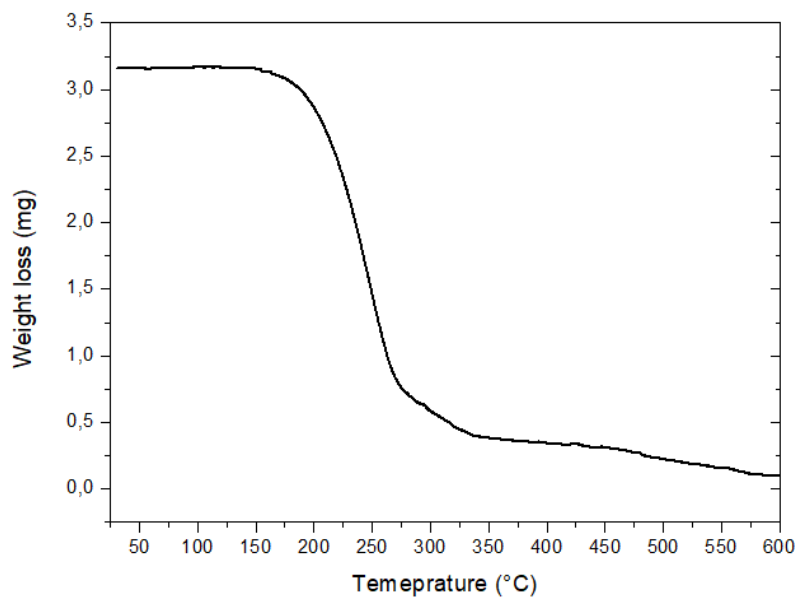

**Figure S17.** TG curves of **4b**.

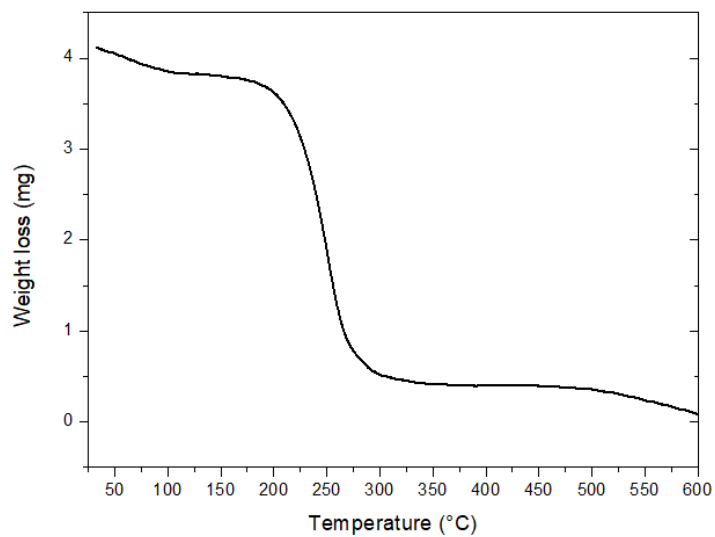

**Figure S18.** TG curves of **5b**.

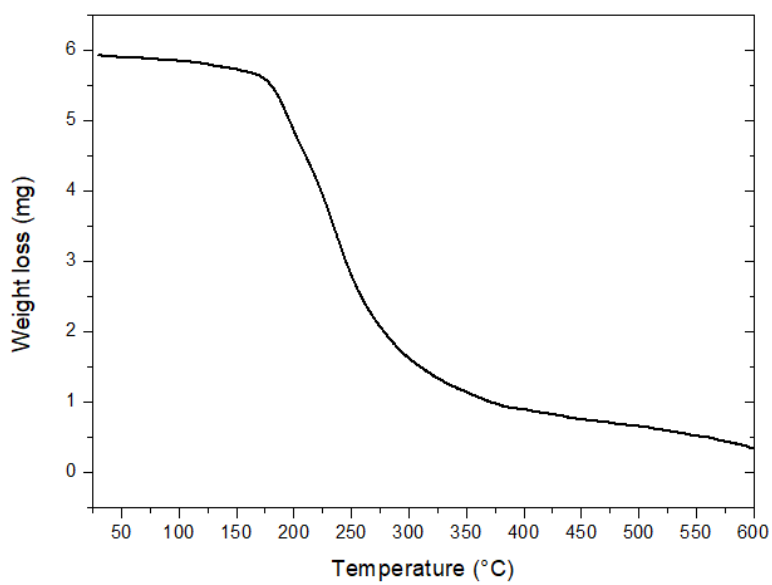

**Figure S19.** TG curves of **6b**.

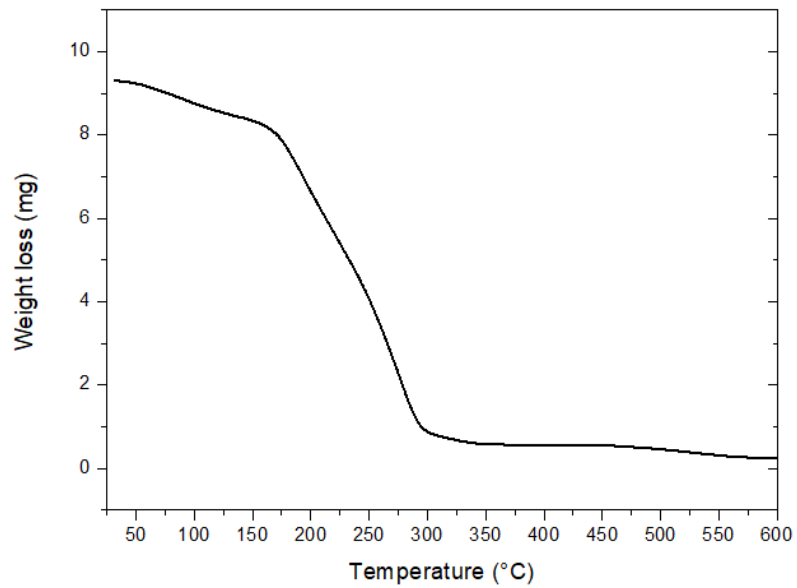

Figure S20. TG curves of **7b**.

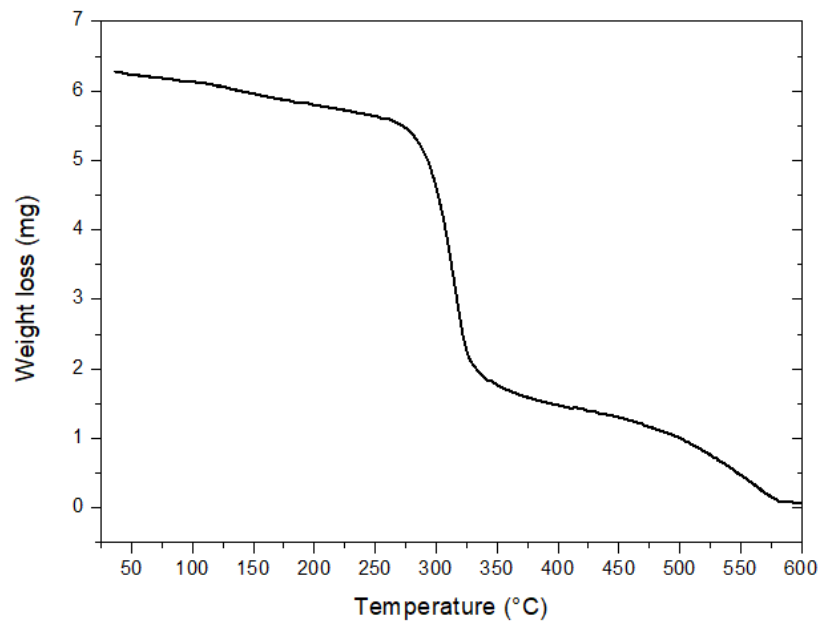

Figure S21. TG curves of **8b**.

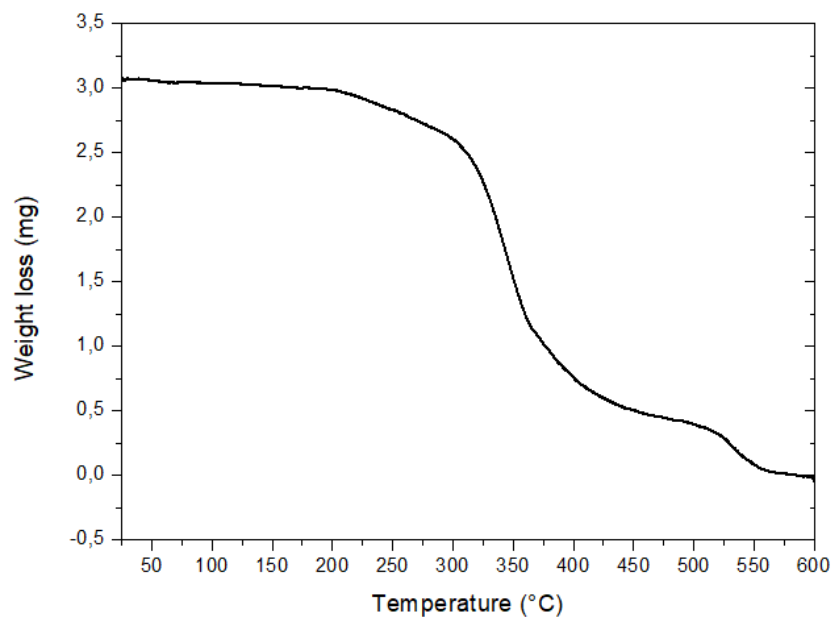

**Figure S22.** TG curves of **9b**.

### 1.3. Single crystal X-ray diffraction of 3b

Room temperature (298(2) K) single-crystal X-ray diffraction data were acquired on a Bruker-AXS Kappa Duo X-ray diffractometer with a Photon II CMOS detector and a MoK $\alpha$  microfocus source. Cell indexing and intensity dataset acquiring strategy and treatment were performed with Bruker software SAINT and SADABS.<sup>1</sup> Structure solution and refinements were achieved with SHELXS and SHELXL,<sup>2</sup> respectively. ORTEP-3<sup>3</sup> was used to prepare the crystal structure projection. Non-hydrogen and hydrogen atoms were treated as anisotropic and isotropic ( $1.2U_{iso} = \text{C}$ ;  $1.5U_{iso} = \text{C}_{\text{methyl}}$  or O) in the refinements, respectively. For hydrogen positions, riding model was employed, with fixed valence bond lengths and angles since hydrogen coordinates oscillated as their bonded carbon or oxygen. The entire X-ray diffraction dataset, loading all structure factors, was deposited in CCDC under deposit code shown below in Table S1. In this table, a briefing of the crystal data acquisition, raw data treatment and the refinement figures-of-merit are also displayed.

#### References:

- 1 APEX3, SAINT and SADABS. Bruker AXS Inc., Madison, Wisconsin, USA, 2015.
- 2 G. M. Sheldrick, *Acta Crystallogr. Sect. C*, 2015, **71**, 3–8.
- 3 L. J. Farrugia, *J. Appl. Crystallogr.*, 2012, **45**, 849–854.

**Table S1.** Crystal data and refinement statistics for the compound elucidated in this study.

|                                                         |              | <b>3b</b>                                         |
|---------------------------------------------------------|--------------|---------------------------------------------------|
| Structural formula                                      |              | C <sub>14</sub> H <sub>28</sub> IN <sub>3</sub> O |
| Molar weight (g/mol)                                    |              | 381.29                                            |
| Crystal system                                          |              | triclinic                                         |
| Space group                                             |              | <i>P</i> -1                                       |
| <i>Z</i>                                                |              | 10                                                |
| $\rho$ (Å)                                              |              | 0.71073                                           |
| <i>T</i> (K)                                            |              | 298(2)                                            |
| Unit cell dimensions                                    | <i>a</i> (Å) | 11.2155(12)                                       |
|                                                         | <i>b</i> (Å) | 18.933(2)                                         |
|                                                         | <i>c</i> (Å) | 22.600(3)                                         |
|                                                         | $\alpha$ (°) | 104.219(4)                                        |
|                                                         | $\beta$ (°)  | 99.501(4)                                         |
|                                                         | $\gamma$ (°) | 92.327(4)                                         |
| <i>V</i> (Å <sup>3</sup> )                              |              | 4571.5(9)                                         |
| Calculated Density (Mg/M <sup>3</sup> )                 |              | 1.385                                             |
| Absorption coefficient (Mm <sup>-1</sup> )              |              | 1.750                                             |
| $\theta$ -range for data collection (°)                 |              | 0.945 –                                           |
| Index ranges                                            |              | $\hat{-13}$ to $\hat{13}$                         |
|                                                         |              | $\hat{-22}$ to $\hat{22}$                         |
|                                                         |              | $\hat{-26}$ to $\hat{26}$                         |
| Data collected                                          |              | 309582                                            |
| Unique reflections                                      |              | 16321                                             |
| Unique reflections with $I > 2\sigma(I)$                |              | 9815                                              |
| Symmetry factor ( <i>R</i> <sub>int</sub> )             |              | 0.1110                                            |
| Completeness to $\theta = 25^\circ$                     |              | 99.7                                              |
| <i>F</i> (000)                                          |              | 1940                                              |
| Parameters refined                                      |              | 860                                               |
| Goodness-of-fit on <i>F</i> <sup>2</sup>                |              | 1.035                                             |
| Final <i>R</i> <sub>i</sub> factor for $I > 2\sigma(I)$ |              | 0.0458                                            |
| <i>wR</i> <sub>2</sub> factor for all data              |              | 0.1274                                            |
| Largest diff. peak / hole (e/Å <sup>3</sup> )           |              | 0.872/-0.595                                      |
| CCDC deposit number                                     |              | 2129558                                           |

## 1.4. Cycloaddition reactions

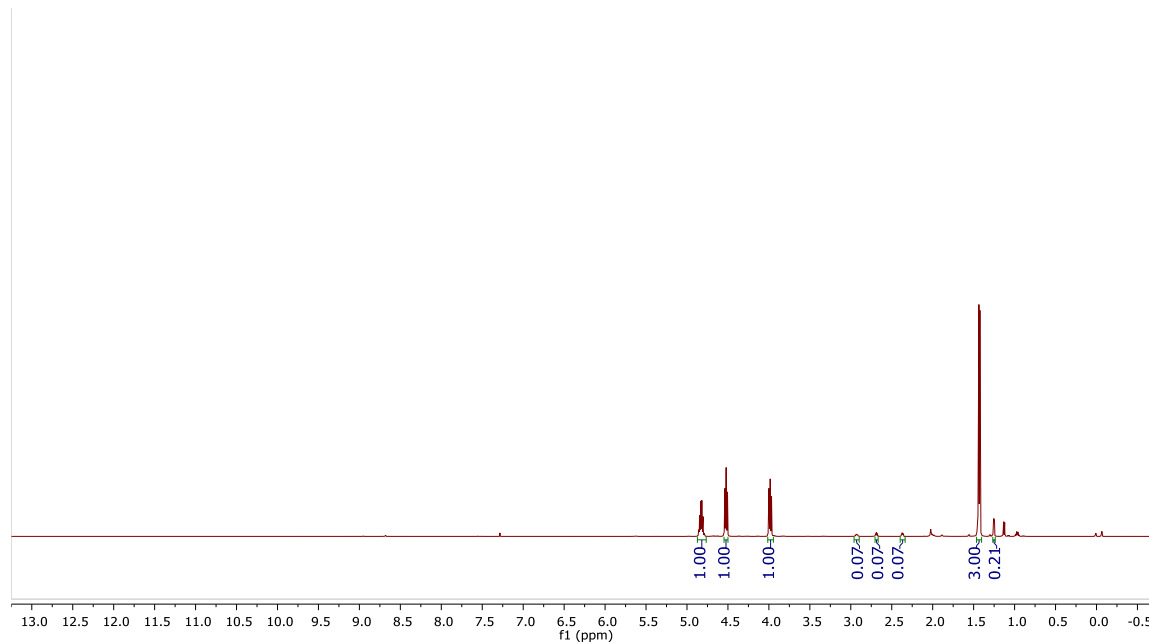

**Figure S23.** <sup>1</sup>H NMR of crude mixture of reaction using propylene oxide and its respective carbonate, entry 1, Table 3.

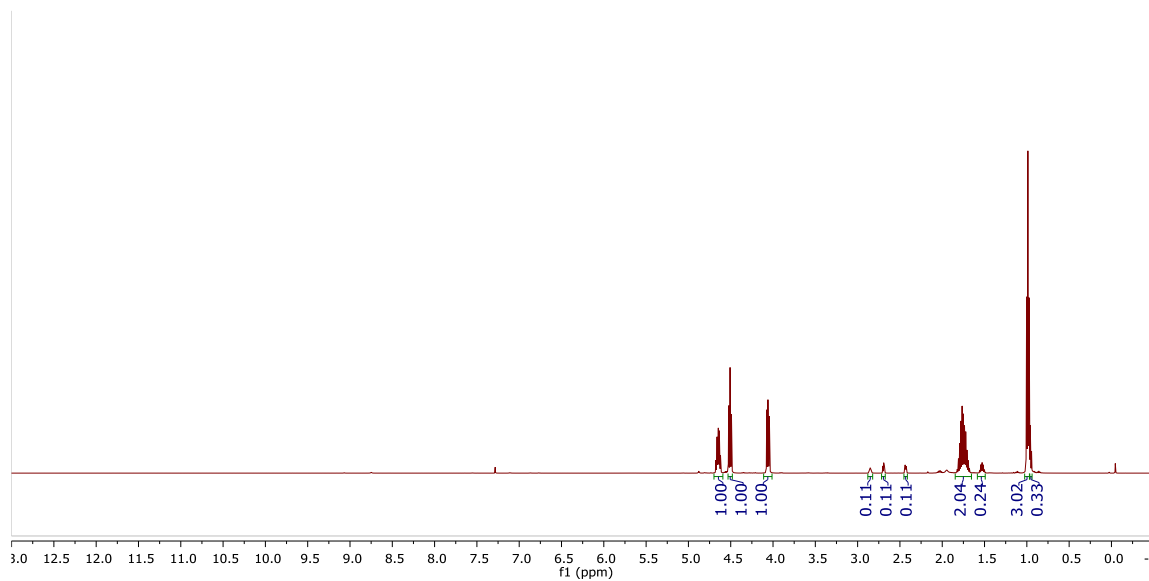

**Figure S24.** <sup>1</sup>H NMR of crude mixture of reaction using 2-butyloxirane and its respective carbonate, entry 2, Table 3.



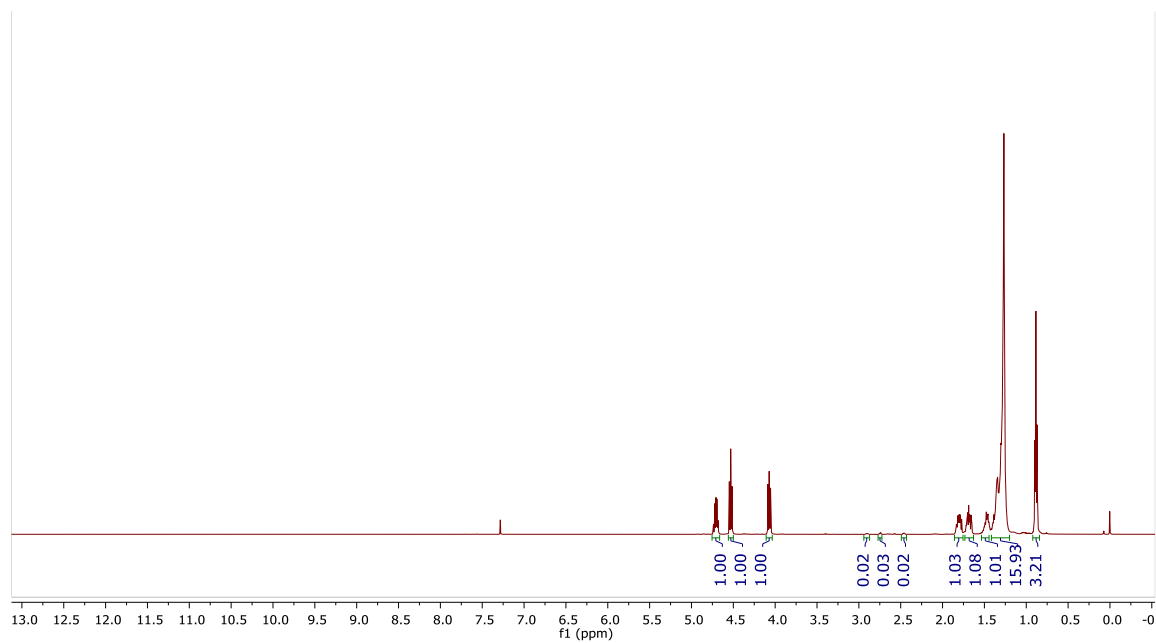

**Figure S25.** <sup>1</sup>H NMR of crude mixture of reaction using 2-decyloxirane and its respective carbonate, entry 3, Table 3.

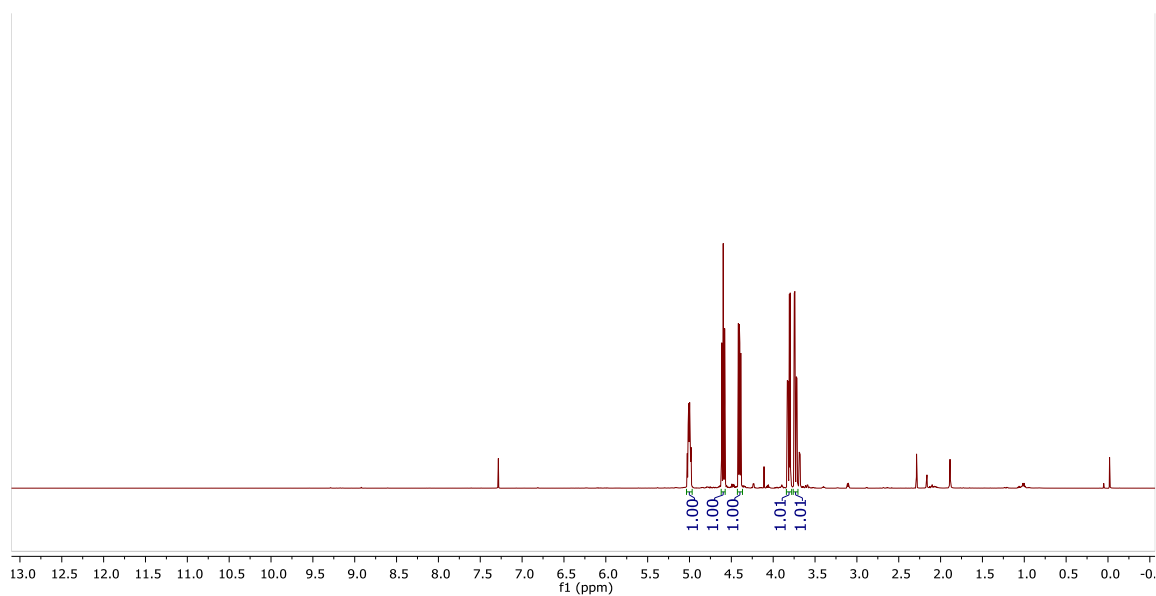

**Figure S26.** <sup>1</sup>H NMR of crude mixture of reaction using epichloridrine and its respective carbonate, entry 4, Table 3.

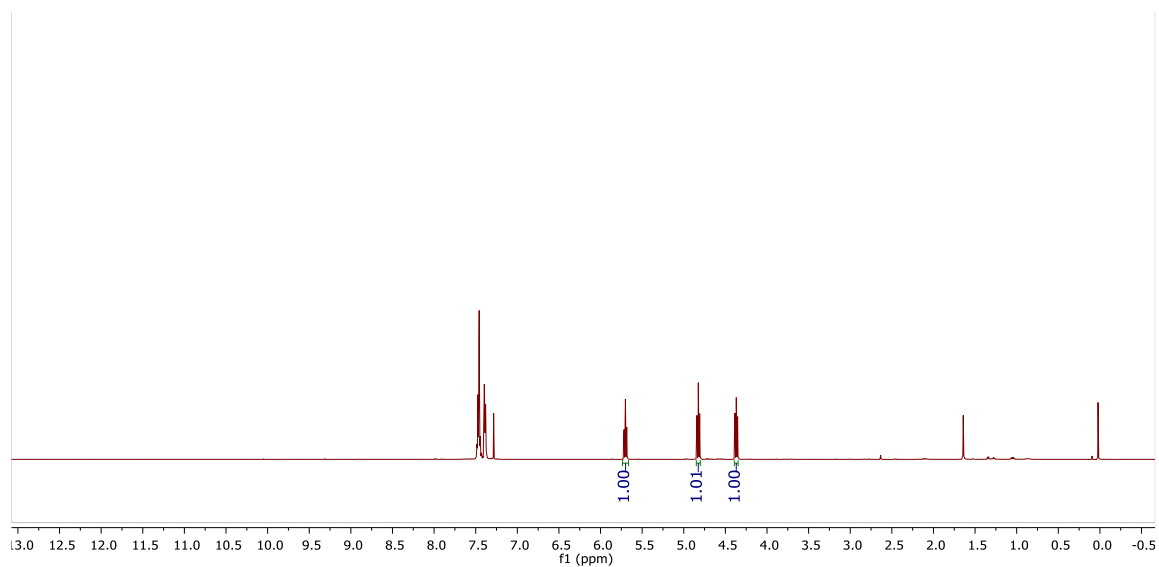

**Figure 27.**  $^1\text{H}$  NMR of crude mixture of reaction using styrene oxide and its respective carbonate, entry 5, Table 3.

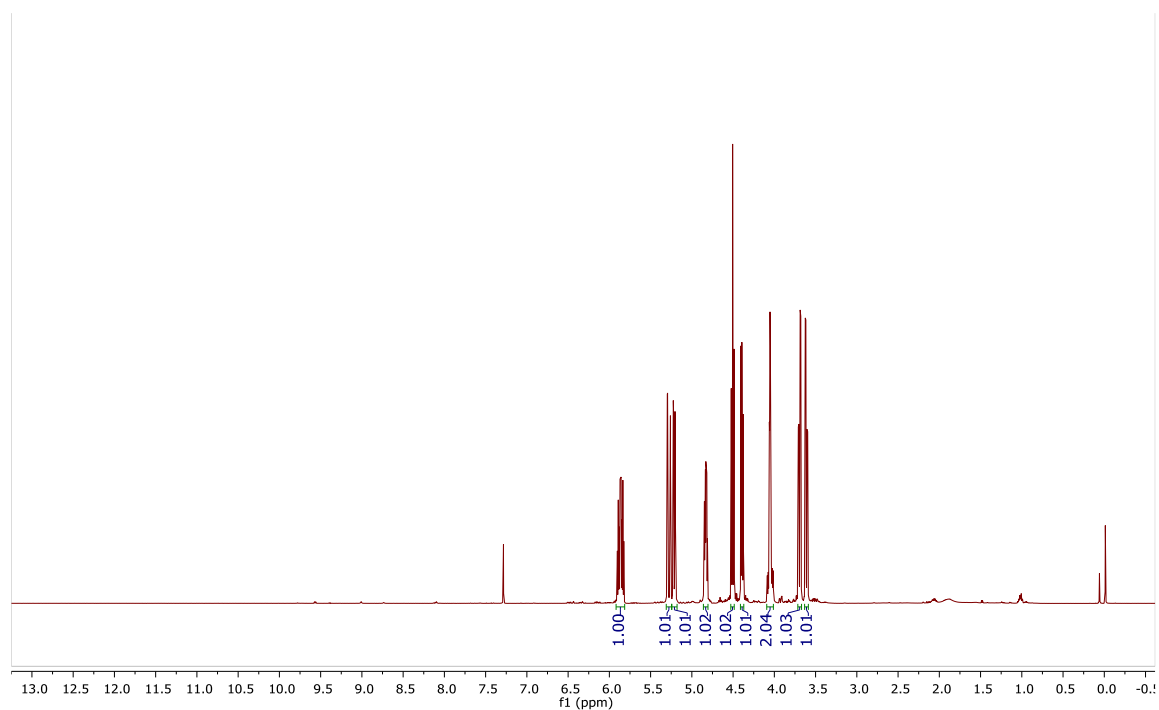

**Figure 28.**  $^1\text{H}$  NMR of crude mixture of reaction using allyl glycidyl ether and its respective carbonate, entry 6, Table 3.

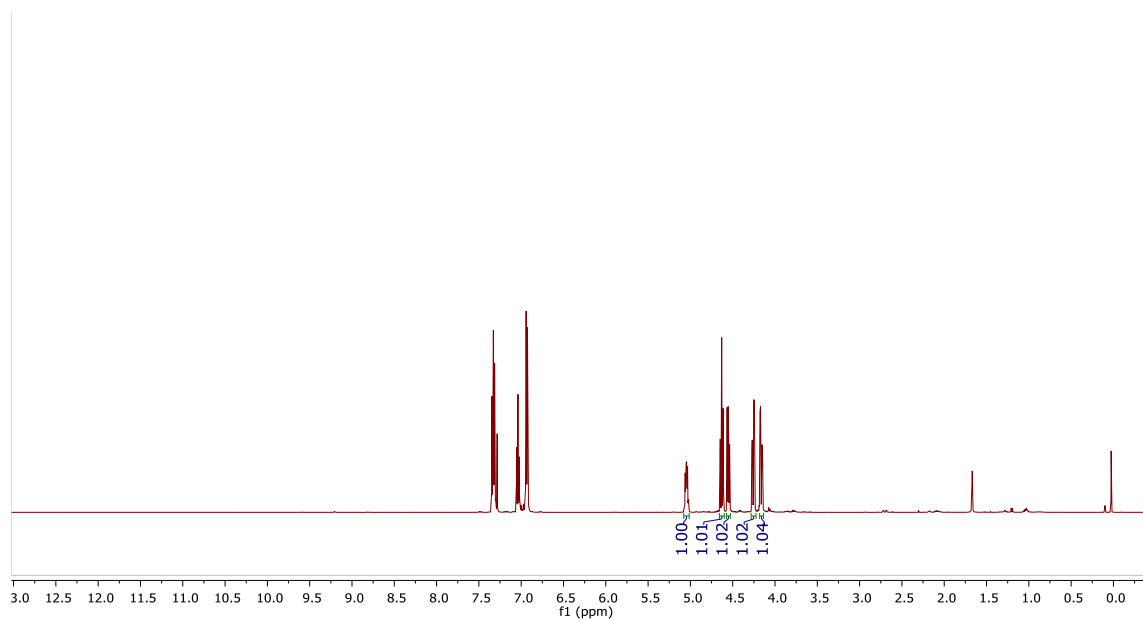

**Figure S29.** <sup>1</sup>H NMR of crude mixture of reaction using 2-(phoxymethyl)oxirane and its respective carbonate, entry 7, Table 3.

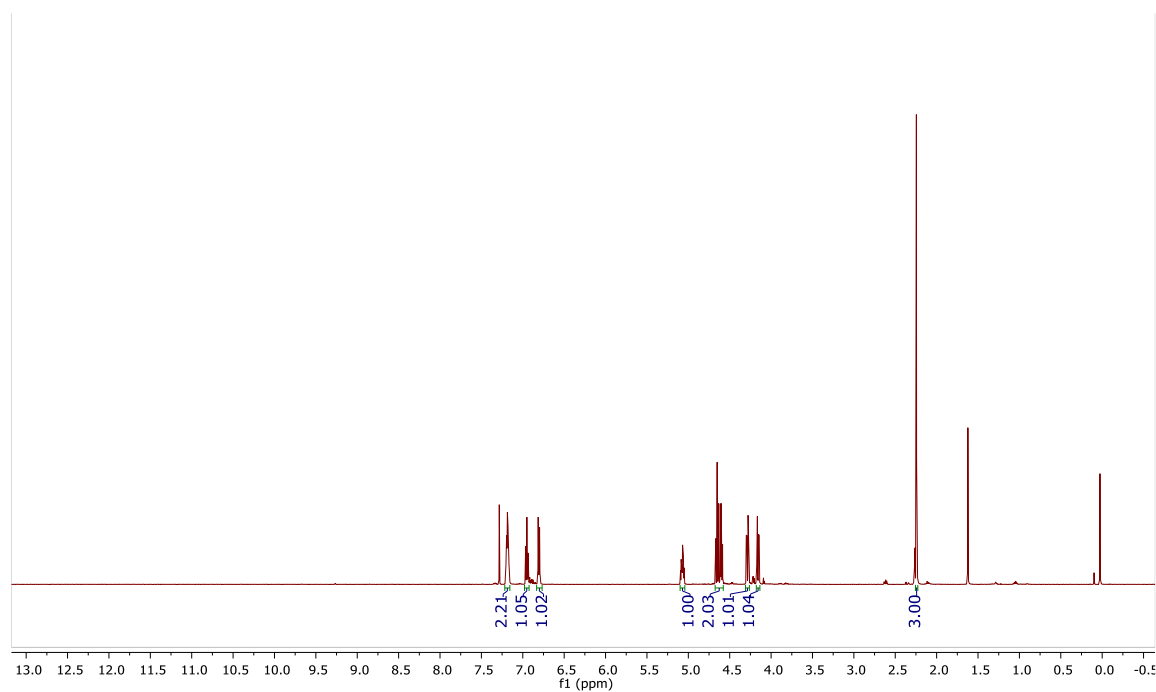

**Figure S30.** <sup>1</sup>H NMR of crude mixture of reaction using glycidyl 2-methylphenyl ether and its respective carbonate, entry 8, Table 3.

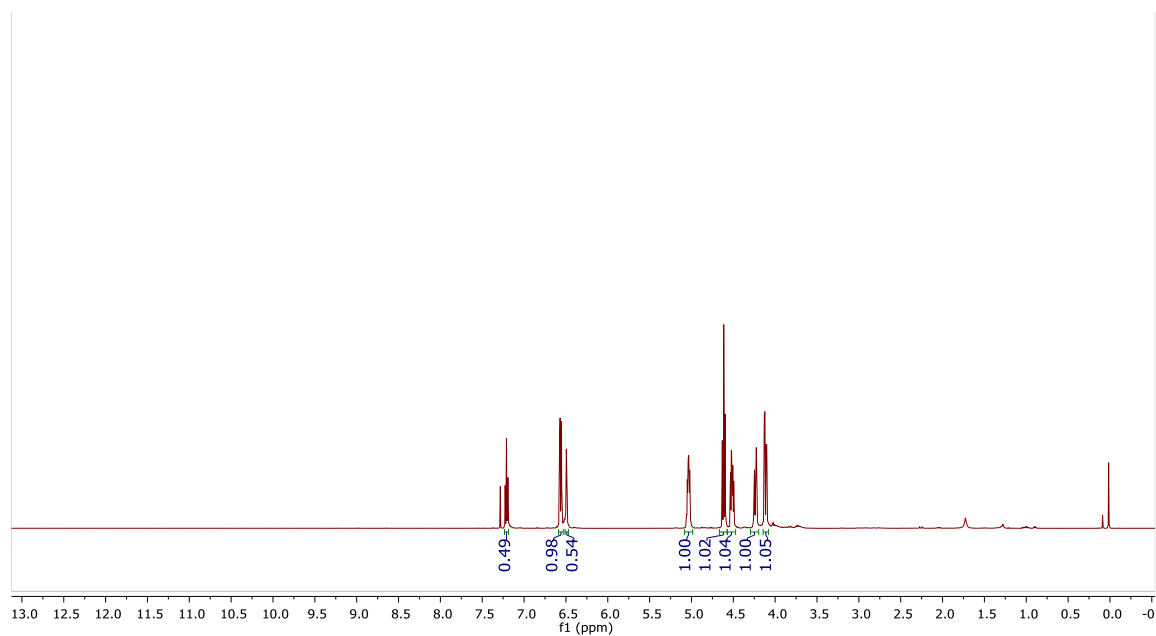

**Figure S31.** <sup>1</sup>H NMR of crude mixture of reaction using resorcinol diglycidyl ether and its respective carbonate, entry 9, Table 3.

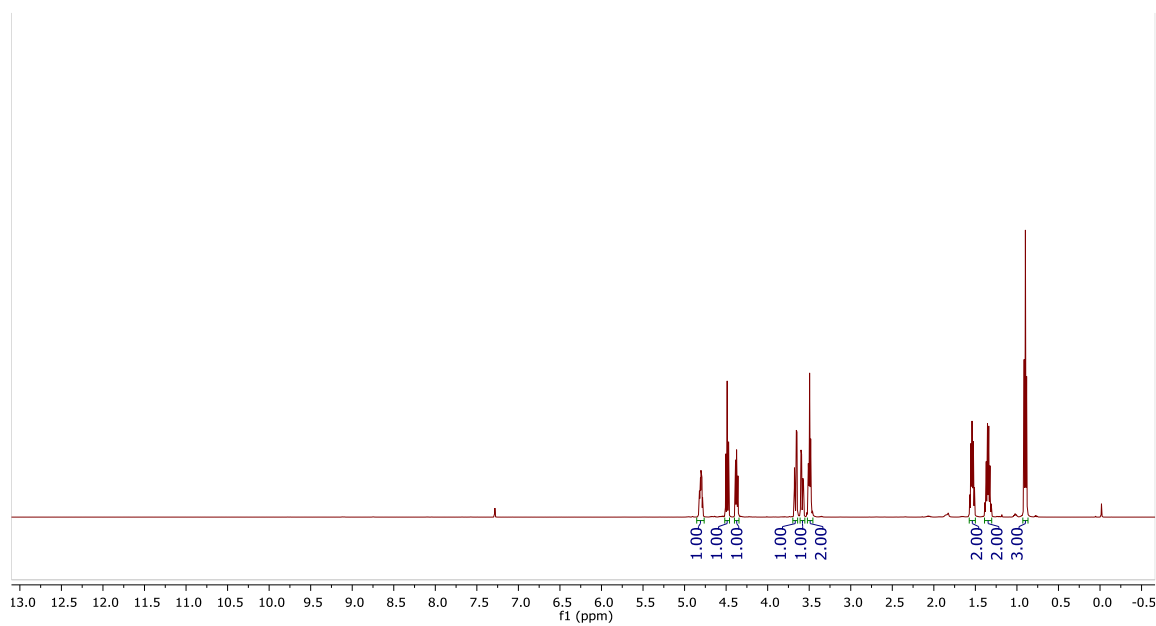

**Figure S32.** <sup>1</sup>H NMR of crude mixture of reaction using butyl glycidyl ether and its respective carbonate, entry 10, Table 3.

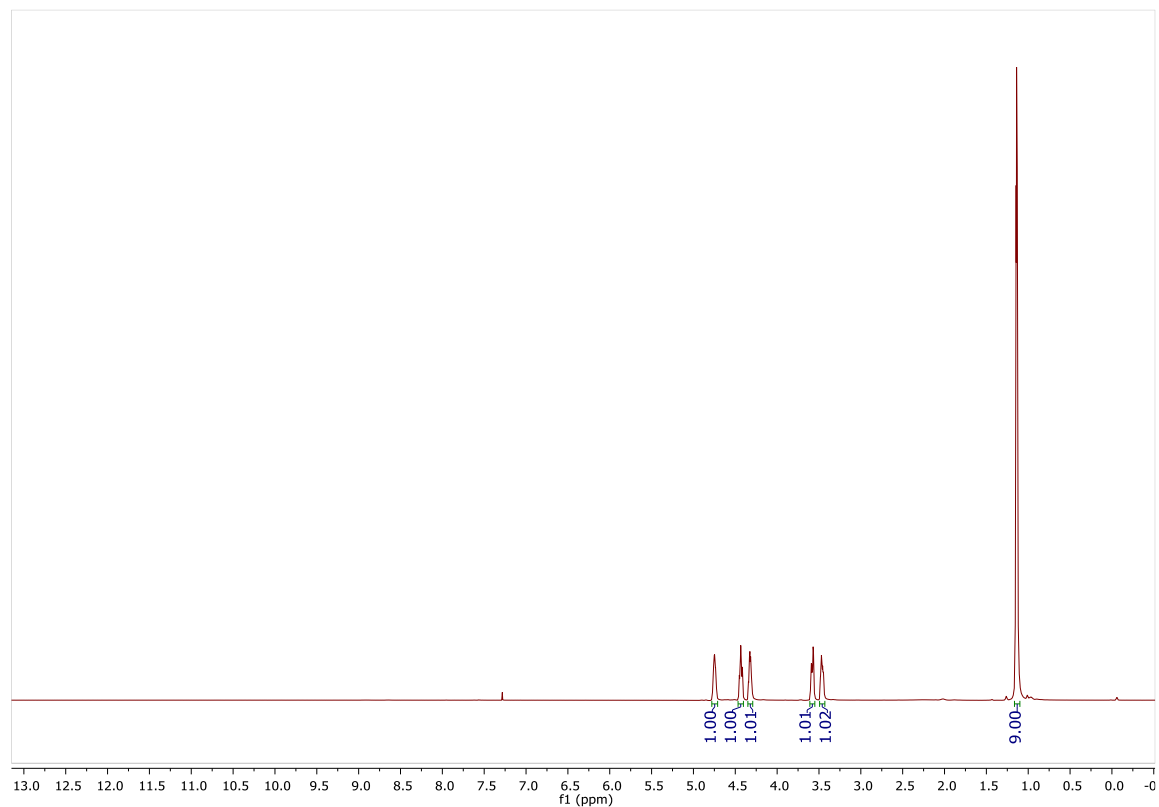

**Figure S33.** <sup>1</sup>H NMR of crude mixture of reaction using tert-butyl glycidyl ether and its respective carbonate, entry 11, Table 3.

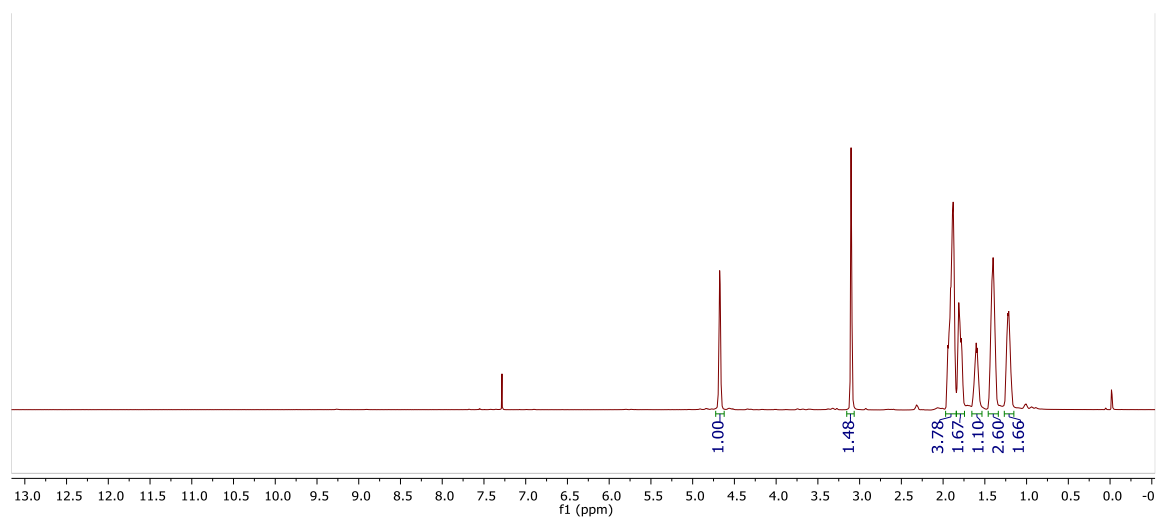

**Figure S34.** <sup>1</sup>H NMR of crude mixture of reaction using cyclohexane oxide (1 hours) and its respective carbonate, entry 12, Table 3.

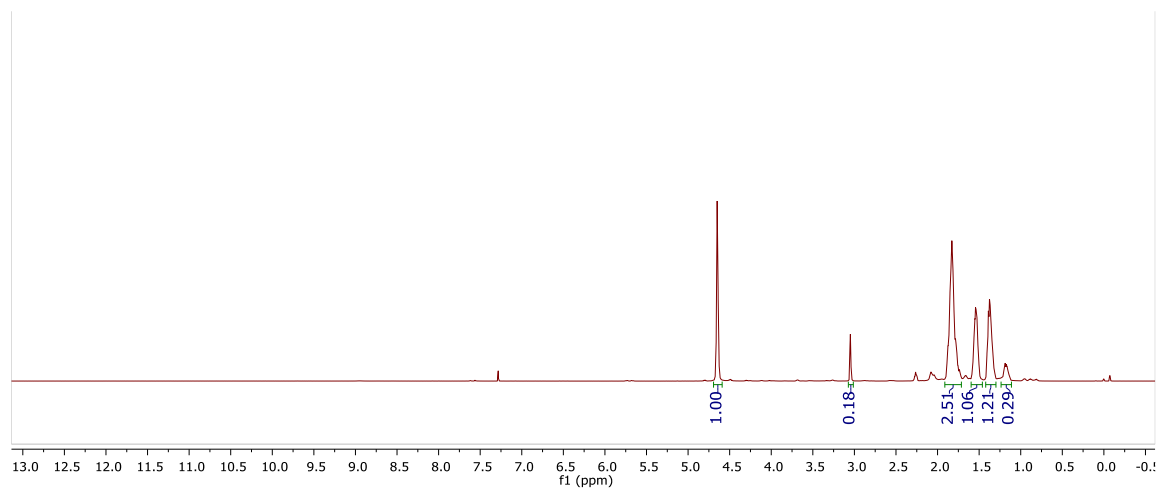

**Figure S35.**  $^1\text{H}$  NMR of crude mixture of reaction using cyclohexane oxide (6 hours) and its respective carbonate, entry 13, Table 3.

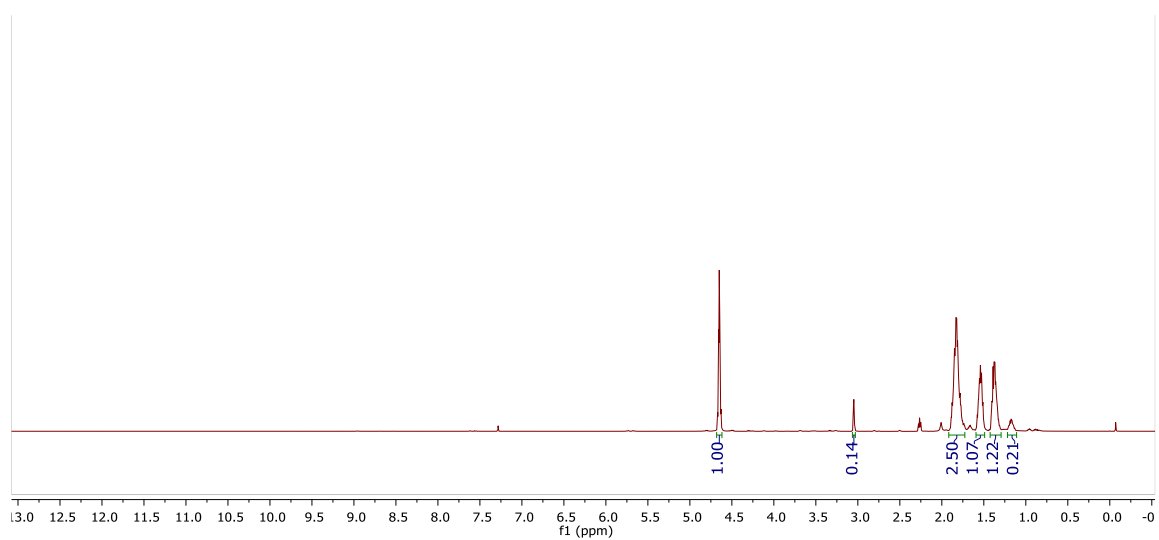

**Figure S36.**  $^1\text{H}$  NMR of crude mixture of reaction using cyclohexane oxide (10 hours) and its respective carbonate, entry 14, Table 3.

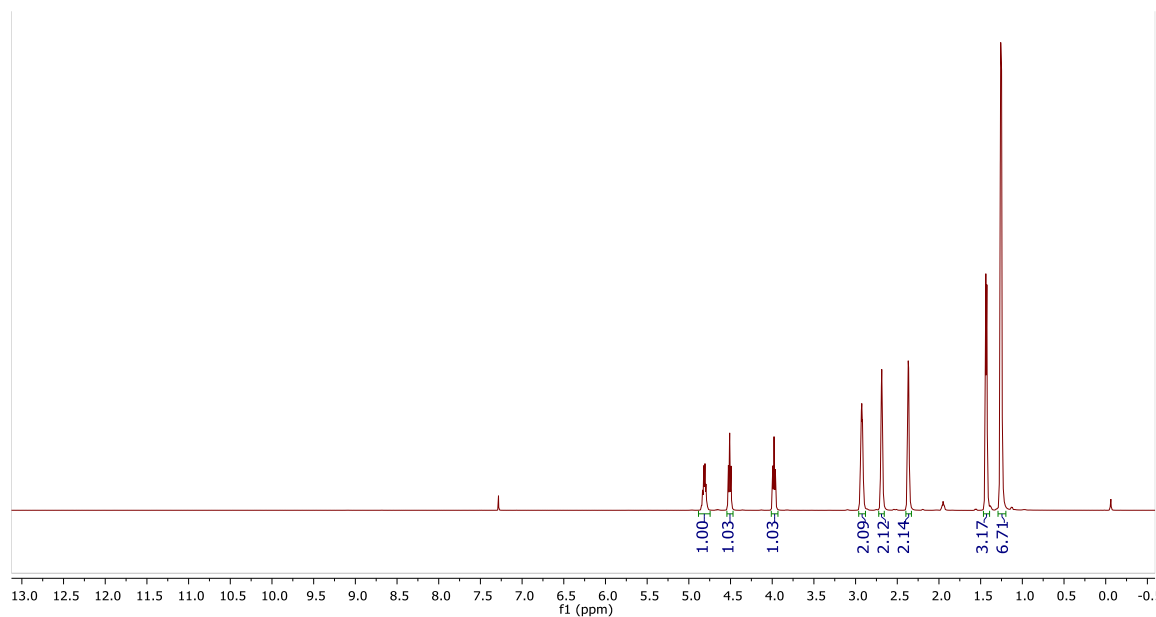

**Figure S37.** <sup>1</sup>H NMR of crude mixture of reaction using propylene oxide (500 mmol, 1 hour) and its respective carbonate, entry 1, Table 4.

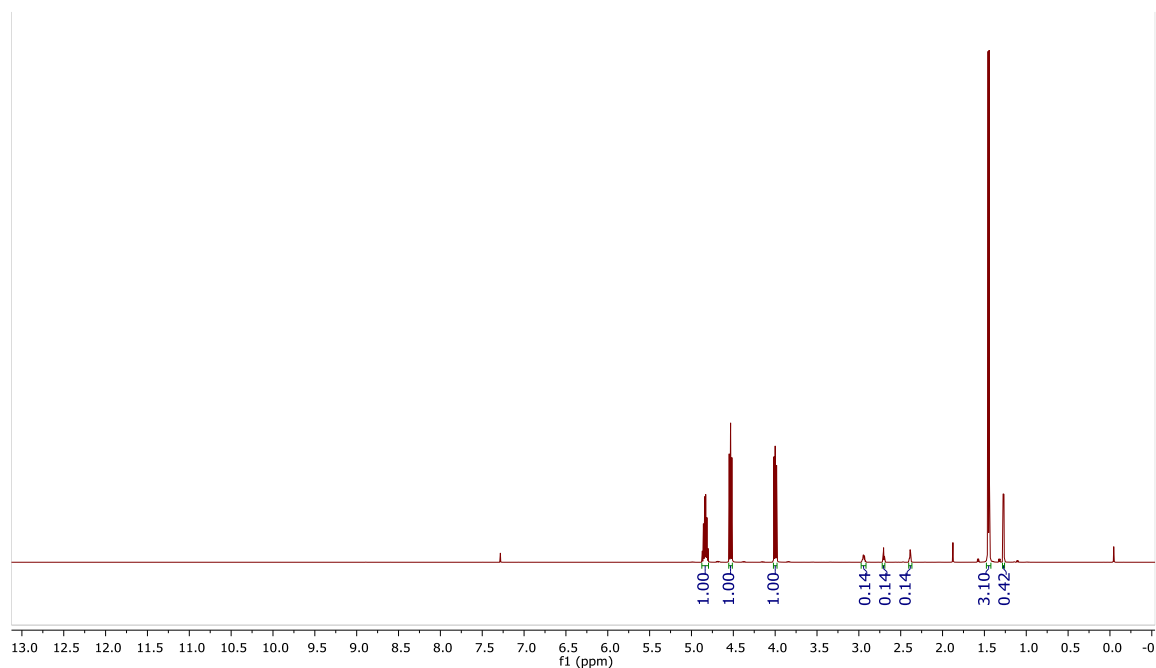

**Figure S38.** <sup>1</sup>H NMR of crude mixture of reaction using propylene oxide (500 mmol, 10 hours) and its respective carbonate, entry 2, Table 4.

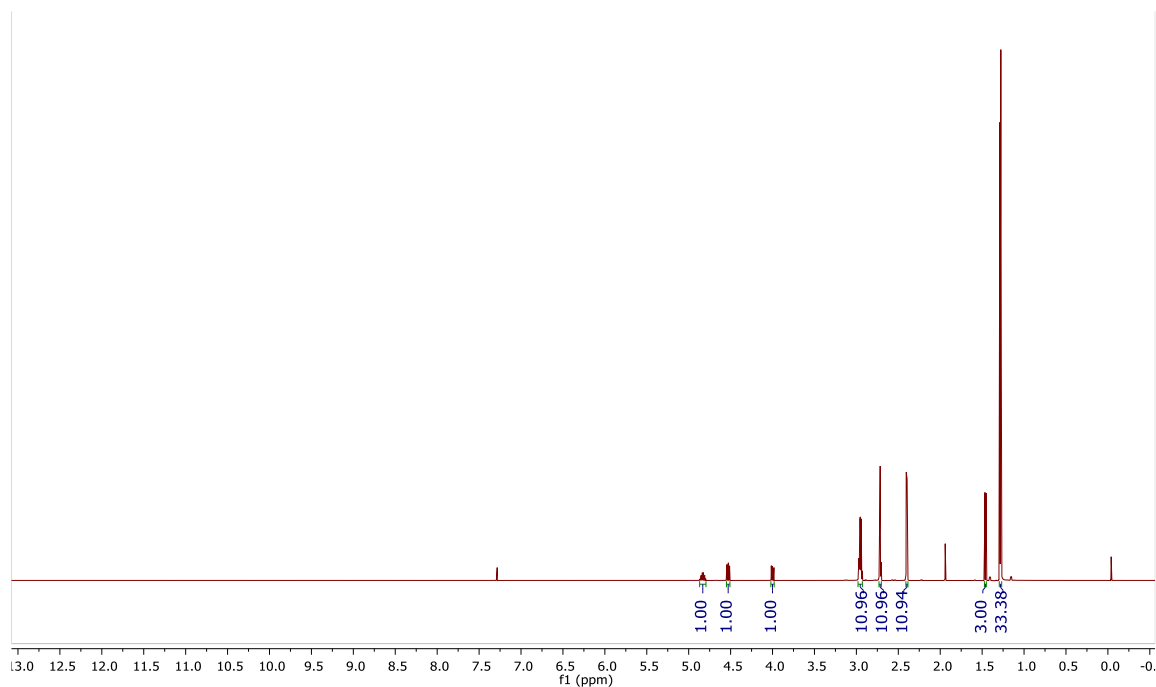

**Figure S39.** <sup>1</sup>H NMR of crude mixture of reaction using propylene oxide (1 mol, 1 hour) and its respective carbonate, entry 3, Table 4.

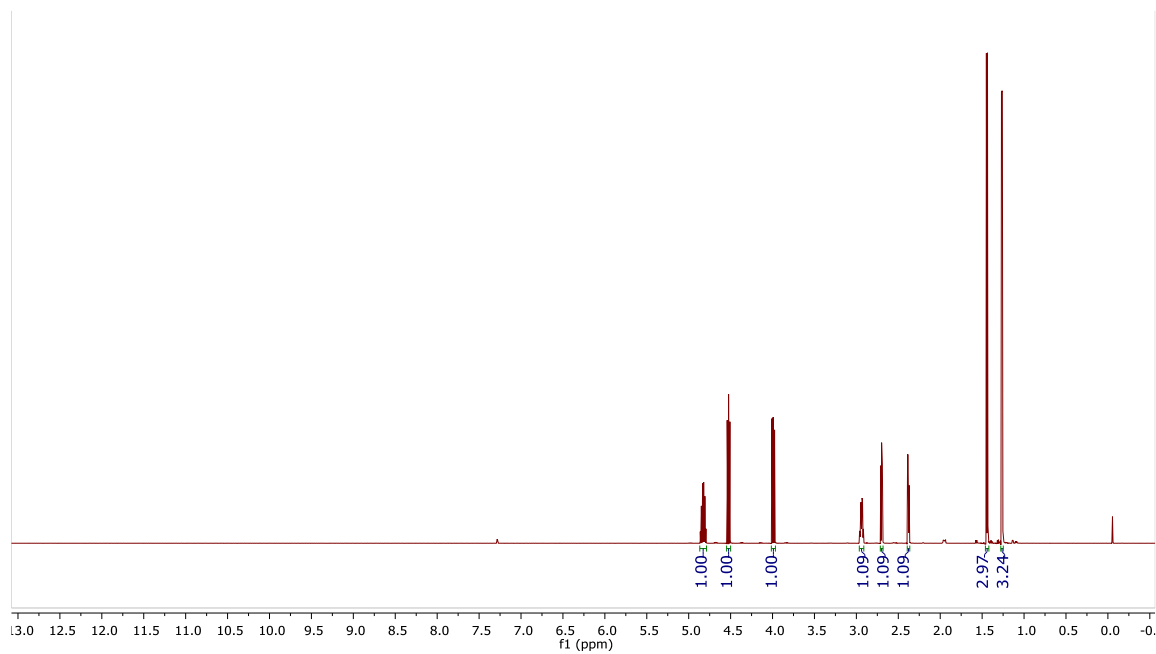

**Figure S40.** <sup>1</sup>H NMR of crude mixture of reaction using propylene oxide (1 mol, 24 hours) and its respective carbonate, entry 4, Table 4.



## 1.5. Reuse experiment

In order to test the reusability of our catalyst, it was performed experiments using 1.5 mol% of catalyst, 25 mmol of PO, 140 °C, 30 bar at 1 hour. The results showed in Figure S35 suggest the IL degradation into respective neutral 1,2,3-triazole which present very low activity (see entry 1, Table 1).

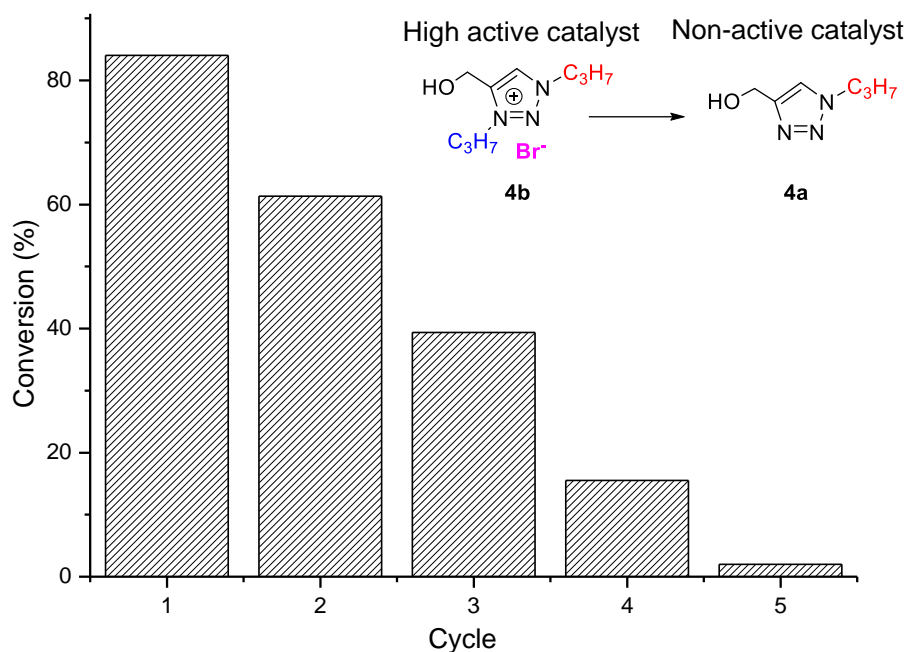

**Figure S41.** Catalyst reuse experiment.

[1] Seung-Hwan Jeon, A.R. Sathiya Priya, Eun-Ji Kang, Kang-Jin Kim Synthesis of a novel alkylimidazolium iodide containing an amide group for electrolyte of dye-sensitized solar cells **2010**, 55, 5652-5658.
